# Supplementary material for: Identification and Analysis of Zinc Efficiency-Associated Loci in Maize
Source: Front Plant Sci. 2021 Nov 15;12:739282. doi: 10.3389/fpls.2021.739282 (PMC8634756; doi:10.3389/fpls.2021.739282)
Supplement: Supplementary file 1 [file Table_12.xlsx]

## Sheet: Sheet1
	TABLE S12 Information of candidate genes
	Chr	QTL	R2(%)	Physical Interval (bp) a	No. of genes	Gene ID	Gene Position (bp) a	Description
	2	qZEAL-ZnSc2-1	63.5	4365980 - 4891246	17	GRMZM2G063328	4349910 - 4366611	Encodes a plant-specific protein that physically interacts with CRWN1 and its homolog CRWN4 and localizes at the inner nuclear membrane
		qZEAL-RDW2-1	7.6			GRMZM2G076212	4464619 - 4466714	S-domain-2 5
		qKB-SDW2-1	10.1			GRMZM2G059740	4512059 - 4514096	S-domain-2 5
		qKB-PH2-1	9			GRMZM2G039961	4571600 - 4572586	Unknown
						GRMZM2G040017	4579883 - 4585389	cax2 - calcium exchanger 2
						GRMZM5G836606	4621723 - 4622308	Unknown
						GRMZM2G086489	4624358 - 4637144	P450 reductase 2
						GRMZM2G086573	4660776 - 4666199	AINTEGUMENTA-like 5
						GRMZM2G086577	4669997-4675455	Protein kinase superfamily protein.
						GRMZM2G086801	4687656 - 4692442	COP9-signalosome 5B
						GRMZM2G386525	4693758 - 4697159	Transmembrane proteins 14C
						GRMZM2G086920	4697104 - 4701070	ZIM32 - ZIM-transcription factor 32
						GRMZM2G033430	4833703 - 4835726	Encodes a a kinetochore hub-protein
						GRMZM2G033219	4834198 - 4840631	6,7-dimethyl-8-ribityllumazine synthase / DMRL synthase / lumazine synthase / riboflavin synthase
						GRMZM2G032977	4847282 - 4850042	Encodes an endonuclease ENDO2
						GRMZM2G095308	4876176 - 4880569	Golgin candidate 2
						GRMZM2G395114	4890135 - 4895146	AST91 - Anti-sigma factor antagonist domain of sulfate transporter91
	2	qZEAL-ZnSc2-1	63.5	7666882 - 8811970	15	GRMZM2G180870	7743440 - 7745613	Xyloglucan endotransglucosylase / hydrolase 9
		qZEAL-RDW2-1	7.6			GRMZM2G168985	7842973 - 7847903	Receptor kinase 3
		qKB-ZnSc2-1	7.8			GRMZM2G169013	7859326 - 7861362	Unknown
		qKB-PH2-2	12			GRMZM2G001289	8285575 - 8291875	HB75 - Homeobox-transcription factor 75
		qKB-SDW2-2	9.2			GRMZM2G001334	8291982 - 8298735	AP-5 complex subunit zeta-1
						GRMZM2G073743	8501834 - 8504484	Chloroplastic lipocalin
						GRMZM2G073861	8505075 - 8508476	Unknown
						GRMZM2G012088	8548241 - 8553375	Polyadenylate-binding protein interacting protein
						GRMZM2G012628	8578099 - 8582568	RNA-binding family protein
						GRMZM2G091302	8720464 - 8728256	PKS1 - polyketide synthesis homolog1
						GRMZM2G443445	8780369 - 8782588	Cinnamyl-alcohol dehydrogenase
						GRMZM2G443447	8783093 - 8788832	Ribosome 60S biogenesis amino-terminal protein
						GRMZM2G302701	8799618 - 8807257	Ribosome 60S biogenesis amino-terminal protein
						GRMZM2G002559	8808453 - 8813074	Actin cytoskeleton-regulatory complex pan-like protein
						GRMZM2G302712	8814586 - 8815407	Ribosomal L27e protein family
	2	qZEAL-RDW2-1	7.6	26774929 - 28662949	28	GRMZM2G062024	26830559 - 26867146	AMT4 - Ammonium transporter 4 / ZmAMF1.1
		qZEAL-R/S2-1	15.3			GRMZM2G362413	26875237 - 26876162	Nicotinamidase 2
		qDK-SDW2-2	13.9			GRMZM2G062179	26881250 - 26885980	Serine carboxypeptidase-like 35
						GRMZM2G062412	26886354 - 26893122	AFG1-like ATPase family protein
						GRMZM2G474883	26938751 - 26940081	Nuclear-encoded CLP protease P7
						GRMZM2G021786	26976465 - 26980590	SK1 - Silkless ears1
						GRMZM2G133012	27375498 - 27378150	RER1 - reticulata-related 1
						GRMZM2G008792	27546080 - 27551006	CKX12 - Cytokinin oxidase12
						GRMZM2G306735	27564347 - 27566833	Unknown
						GRMZM5G806743	27566960 - 27567585	Unknown
						GRMZM2G306741	27584413 - 27591924	Unknown
						GRMZM2G006964	27763856 - 27766676	GA2ox2 - Gibberellin 2-oxidase2; ZmGA2ox1
						GRMZM5G831795	28432215 - 28444239	IAA-leucine-resistant (ILR1)-like 3
						GRMZM2G387389	27827322 - 27833556	WPP domain associated protein
						GRMZM2G178709	27834570 - 27861240	Expressed protein
						GRMZM2G178693	27867805 - 27870068	PIP2A - Plasma membrane intrinsic protein 2
						GRMZM2G178681	27871624 - 27892346	Tetratricopeptide repeat (TPR)-like superfamily protein
						GRMZM2G079683	27954426 - 27955542	Unknown
						GRMZM2G171372	28034741 - 28037662	Small nuclear ribonucleoprotein family protein
						GRMZM2G118345	28048958 - 28052061	PHE ammonia lyase 1
						GRMZM2G441347	28117445 - 28120590	PAL6 - phenylalanine ammonia lyase 6.
						GRMZM2G003775	28131048 - 28132162	Adenosine kinase 1
						GRMZM2G089767	28137894 - 28141868	Adenosine kinase 2
						GRMZM2G059365	28394859 - 28406297	Unknown
						GRMZM2G002903	28564081 - 28569611	Nuclear transport factor 2
						GRMZM2G076279	28639720 - 28644363	S-adenosyl-L-methionine-dependent methyltransferases superfamily protein
						GRMZM2G702991	28644600 - 28645965	Unknown
						GRMZM5G889644	28662853 - 28665182	Eisosome protein
	2	qZEAL-ZnSc2-2	10.1	33679284 - 37133343	47	GRMZM2G018876	33680677 - 33725100	dbb1 - double B-box zinc finger protein1
		qDK-ZnSc2-1	16.4			GRMZM2G364597	33725612 - 33728582	RNA-binding CRS1 / YhbY domain protein
		qDK-SDW2-3	11.5			GRMZM2G062673	33730476 - 33731690	EF hand calcium-binding protein family
		qDK-RDW2-2	9.3			GRMZM2G052142	33765049 - 33803595	Protein kinase family protein
						GRMZM2G057113	33834872 - 33840542	S-adenosyl-L-methionine-dependent methyltransferases superfamily protein
						GRMZM2G178236	33953219 - 33958431	Nuclear RNA polymerase C1
						GRMZM2G080176	34007784 - 34029162	Nuclear RNA polymerase C1
						GRMZM5G876621	34343251 - 34361966	IBR domain-containing protein
						GRMZM2G051984	34537876 - 34541534	Protein kinase superfamily protein
						GRMZM2G081053	34567122 - 34576294	Ankyrin
						GRMZM2G364901	34688186 - 34701280	Prpo2 - protoporphyrinogen IX oxidase 2
						GRMZM2G021219	34985296 - 34990180	Myosin-H heavy protein
						GRMZM2G139022	35185497 - 35187206	Unknown
						GRMZM2G139038	35192269 - 35197040	Protein kinase superfamily protein
						GRMZM2G021107	35261824 - 35266398	Unknown
						GRMZM2G021710	35273097 - 35277507	Tetratricopeptide repeat (TPR)-like superfamily protein
						GRMZM2G023204	35324876 - 35326785	AGC kinase family protein.
						GRMZM2G054046	35876928 - 35877532	Polysaccharide biosynthesis protein
						AC193754.3_FG008	35880818 - 35882857	MUTS homolog 2
						GRMZM2G099183	35949723 - 35954127	Eukaryotic rpb5 RNA polymerase subunit family protein.
						GRMZM2G021619	36079677 - 36082153	Leucine-rich repeat protein kinase family protein
						GRMZM2G030598	36134575 - 36154824	Galactose oxidase / kelch repeat superfamily protein
						GRMZM2G102183	36317292 - 36319766	MAS1 - malate synthase1
						GRMZM2G102238	36320023 - 36330061	Acid phosphatase / vanadium-dependent haloperoxidase-related protein
						GRMZM2G112072	36358387 - 36360987	Mitotic spindle checkpoint protein MAD2
						GRMZM2G130109	36445644 - 36449142	Ribonuclease inhibitor
						GRMZM2G130224	36450557 - 36453156	Restriction endonuclease type II-like superfamily protein
						GRMZM2G130230	36456199 - 36464613	GPDH 1 - glucose-6-phosphate dehydrogenase 1
						GRMZM2G142712	36563910 - 36568978	Plant UBX domain-containing protein 1
						GRMZM2G093720	36586610 - 36591326	Protein phosphatase 2A regulatory B subunit family protein
						GRMZM2G093557	36591474 - 36594714	TIDP3431
						GRMZM2G100872	36597705 - 36602732	HAG103a - histone acetyl transferase GNAT/MYST103a; Gcn5-related N-acetyltransferase (GNAT)
						GRMZM2G100815	36605205 - 36613857	Galactose oxidase / kelch repeat superfamily protein
						GRMZM2G372930	36617989 - 36618665	Galactose oxidase / kelch repeat superfamily protein
						GRMZM2G063262	36763535 - 36768059	Transmembrane protein
						GRMZM2G063163	36767527 - 36778587	COP1-interacting protein 4.1
						GRMZM2G045070	36833209 - 36838151	MA3 domain-containing protein
						GRMZM2G044989	36838775 - 36842537	AAA-type ATPase family protein
						GRMZM5G828887	36892115 - 36892574	Unknown
						GRMZM2G022229	36906263 - 36909070	Ku70-binding family protein
						GRMZM2G022413	36927268 - 36929809	Peptidemethionine sulfoxide reductase 1
						GRMZM2G022627	36936010 - 36938218	Transducin / WD40 repeat-like superfamily protein
						GRMZM2G100263	37046102 - 37048030	Encodes a protein with high similarity to mammalian MHF2
						GRMZM2G100315	37049378 - 37052466	Protein-l-isoaspartate methyltransferase 1
						GRMZM2G100344	37051829 - 37053575	S-adenosyl-L-methionine-dependent methyltransferases superfamily protein
						GRMZM2G165633	37117338 - 37120603	Cellulase (glycosyl hydrolase family 5) protein
						GRMZM2G057637	37132847 - 37133814	Unknown
	2	qZEAL-SDW2-1	20.7	108630218 - 134311272	87	GRMZM2G158043	108630218 - 108681539	ZPU1 - Pullulanase-type starch debranching enzyme 1
		qZEAL-SDW2-2	17.3			GRMZM2G140299	108932089 - 108933535	C2H2-type zinc finger family protein
		qZEAL-RDW2-2	10.6			GRMZM2G167613	109114827 - 109116143	Cinnamyl alcohol dehydrogenase 9
		qZEAL-R/S2-1	20.7			GRMZM2G131912	109575238 - 109580764	Pectin lyase-like superfamily protein
		qDK-ZnSc2-2	23.3			GRMZM2G072388	109876614 - 109877935	D-isomer specific 2-hydroxyacid dehydrogenase family protein
		qDK-PH2-1	11.89			GRMZM2G367367	110084872 - 110087304	Cytidine/deoxycytidylate deaminase family protein
		qDK-SDW2-1	23.17			GRMZM2G021849	110392810 - 110408143	UDP-Glycosyltransferase superfamily protein
		qDK-RDW2-1	14.23			GRMZM2G108686	110425531 - 110430543	Cytochrome oxidase complex assembly protein
		qDK-R/S2-1	20.5			GRMZM2G081745	110482584 - 110497021	Sec23/Sec24 protein transport family protein
						GRMZM2G053631	110653558 - 110662313	Werner syndrome-like exonuclease
						GRMZM2G077150	110745812 - 110749052	Protein of unknown function
						GRMZM2G069773	110822851 - 110826717	Polyketide cyclase/dehydrase and lipid transport superfamily protein
						GRMZM2G033894	110896551 - 110900469	Pyruvate dehydrogenase E1 alpha
						GRMZM2G021223	111133849 - 111136804	ASRP 2 - Arginine/serine-rich splicing factor 2
						GRMZM2G129208	111202666 - 111206752	ATP binding
						GRMZM2G097827	111277537 - 111278715	Calcium-binding EF-hand family protein
						GRMZM2G319454	111314923 - 111315856	Transmembrane protein
						AC209739.3_FG003	111316608 - 111317684	Calcium-dependent lipid-binding family protein
						GRMZM2G167008	111479203 - 111481092	Unknown
						GRMZM2G075551	111975423 - 111980675	D111/G-patch domain-containing protein
						GRMZM2G163594	111983886 - 111988672	Putative serine esterase family protein
						GRMZM2G138774	112083732 - 112085395	Protein kinase superfamily protein
						GRMZM2G050590	112596556 - 112601748	E2F5 - E2F-DP-transcription factor 25
						GRMZM2G158147	112635028 - 112643280	Pseudouridine synthase / archaeosine transglycosylase-like family
						GRMZM2G162353	112855820 - 112864281	Zinc finger (Ran-binding) family protein
						GRMZM2G119261	113178331 - 113186814	MYBR114 - MYB-related-transcription factor 114
						GRMZM2G444138	113281192 - 113282484	Transmembrane protein
						GRMZM2G076343	113312679 - 113314160	Unknown
						GRMZM2G076394	113315173 - 113318726	O-acetyltransferase family protein
						GRMZM2G108871	113433216 - 113433788	Translation protein SH3-like family protein
						GRMZM2G147659	113778181 - 113779053	Hypothetical protein
						GRMZM2G147623	113801911 - 113811504	C3H10 - C3H-transcription factor 310
						GRMZM2G479125	113900433 - 113903729	Rhomboid protein-related
						GRMZM2G513103	113903858 - 113904594	Unknown
						GRMZM2G039029	114020953 - 114023630	Hydroxyproline-rich glycoprotein family protein
						GRMZM2G480356	114079423 - 114083034	Transmembrane protein
						GRMZM2G058300	114159831 - 114166151	Peptidase S24/S26A/S26B/S26C family protein
						GRMZM2G165597	114779404 - 114789418	Leucine-rich repeat protein kinase family protein
						GRMZM2G165629	114869603 - 114879021	UCP2 - uncoupling protein 2
						GRMZM2G467338	114883990 - 114890380	Aconitase 3
						GRMZM2G008649	115064269 - 115065362	Jasmonate-induced protein
						GRMZM5G812860	115068521 - 115068982	Unknown
						GRMZM2G506062	115356576 - 115358291	Unknown
						GRMZM2G325453	115620814 - 115624577	Ribosomal protein L9 / RNase H1
						GRMZM2G104013	116167763 - 116171761	EXPB16 - BETA-EXPANSIN16
						GRMZM2G092160	116778906 - 116781182	Expansin B2, member of BETA-EXPANSINS
						GRMZM2G041493	117455994 - 117456806	Unknown
						GRMZM2G003692	118062635 - 118080083	NAD(P)-binding Rossmann-fold superfamily protein
						GRMZM2G135730	118423324 - 118424180	Unknown
						GRMZM2G466743	120362096 - 120364028	One helix protein
						AC235540.1_FG002	120436484 - 120440654	Leucine-rich repeat protein kinase family protein
						AC235540.1_FG001	120471442 - 120476487	Peptidase M20 / M25 / M40 family protein
						GRMZM2G056695	120651694 - 120666392	Sec23 / Sec24 protein transport family protein
						GRMZM2G139882	120761162 - 120807175	Embryonic stem cell-specific 5-hydroxymethylcytosine-binding protein
						GRMZM2G076905	121581901 - 121584496	Acidic leucine-rich nuclear phosphoprotein 32 family B protein
						GRMZM2G148270	121912468 - 121913403	Ubiquitin carboxyl-terminal hydrolase
						GRMZM2G100794	122229182 - 122253419	C3H19 - C3H-transcription factor 319
						GRMZM2G031802	122585611 - 122610591	Endoplasmic reticulum retention defective 2B
						GRMZM2G451357	122923682 - 122945060	Ubiquitin-specific protease 5
						GRMZM2G075680	124094006 - 124108029	Sec23 / Sec24 protein transport family protein
						GRMZM5G877316	125696253 - 125710943	ARM repeat superfamily protein
						GRMZM2G085924	127092912 - 127094499	HSBP 1 - Herbicide safener binding protein 1
						GRMZM2G132154	127442670 - 127445933	Serine carboxypeptidase-like 42
						AC203394.3_FG004	127598915 - 127600727	Unknown
						GRMZM2G301355	127824056 - 127827013	CRINKLY4 related 3
						GRMZM2G082330	128043496 - 128078034	SIGNAL PEPTIDE PEPTIDASE-LIKE 3
						GRMZM2G152739	128197253 - 128201560	Alpha/beta-Hydrolases superfamily protein
						GRMZM2G090086	128291939 - 128299210	THA 1 - Thylakoid assembly 1
						GRMZM2G365677	128405636 - 128407367	F-box and associated interaction domains-containing protein
						GRMZM2G395736	128563795 - 128582384	Transcription coactivators
						GRMZM2G046498	129302719 - 129308642	NAD kinase 2
						GRMZM2G143403	129638619 - 129640846	Zinc knuckle (CCHC-type) family protein
						GRMZM2G143397	129698222 - 129698803	Unknown
						GRMZM2G020704	129941663 - 129958348	Evolutionarily conserved C-terminal region 6
						GRMZM2G118800	130291275 - 130295558	Aldehyde dehydrogenase 3H1
						GRMZM2G128268	130522633 - 130525928	Eukaryotic aspartyl protease family protein
						GRMZM2G335126	130739976 - 130749021	Armadillo / beta-catenin-like repeat; C2 calcium / lipid-binding domain protein
						GRMZM2G087105	130950189 - 130956550	F-box family protein with WD40/YVTN repeat doamin
						GRMZM2G087212	130989985 - 130996756	Transmembrane nine 1
						GRMZM2G124715	131348618 - 131350096	MYB64 - MYB-transcription factor 64
						GRMZM2G416491	132080689 - 132083859	Protein tyrosine phosphatase 1
						GRMZM2G565940	132115840 - 132116225	Unknown
						GRMZM2G178199	132571652 - 132572640	Disease resistance-responsive family protein
						GRMZM2G109547	133152745 - 133154441	ATP-binding casette family G25
						GRMZM2G111143	133839420 - 133842192	O-Glycosyl hydrolases family 17 protein
						GRMZM2G065692	134037600 - 134048302	NB-ARC domain-containing disease resistance protein
						GRMZM2G003755	134132718 - 134138847	NB-ARC domain-containing disease resistance protein
	2	qZEAL-SDW2-1	20.7	153130256 - 168703182	123	GRMZM2G155437	153128564 - 153130652	Ribosomal protein L10 family protein
		qZEAL-RDW2-2	10.6			GRMZM5G804382	153140326 - 153142545	Clathrin heavy chain
		qZEAL-SDW2-2	17.3			GRMZM2G085295	153148026 - 153150746	Unknown
		qDK-ZnSc2-3	21.24			GRMZM2G411159	153319251 - 153323969	Encodes ESK1
		qDK-PH2-2	9.64			GRMZM2G117300	153399473 - 153402030	CAX-interacting protein 2
		qDK-R/S2-2	21.17			GRMZM2G146378	153502302 - 153507204	Mitochondrial substrate carrier family protein
						GRMZM2G146283	153510052 - 153513609	PBF1 - Prolamin-box binding factor 1
						GRMZM2G146267	153515932 - 153524505	RNA binding family protein
						GRMZM2G151268	153617786 - 153621561	Tonneau family protein
						GRMZM2G416684	153790017 - 153794405	Protein kinase superfamily protein
						GRMZM2G070284	153858822 - 153866012	Emsy N Terminus (ENT) / plant Tudor-like domains-containing protein
						GRMZM2G070054	153927469 - 153942627	FRIGIDA-like protein
						GRMZM2G180704	153945519 - 153953150	SNRK1a2 - SNF1-related kinase alpha1-like 2
						GRMZM2G180697	153954614 - 153955335	Unknown
						GRMZM2G180691	153956036 - 153967953	Protein phosphatase X 2
						GRMZM2G010363	154601868 - 154610777	Sec14p-like phosphatidylinositol transfer family protein
						GRMZM2G021299	155072701 - 155102547	Ubiquitin-protein ligase 1
						AC217842.3_FG001	155786938 - 155791567	PTK4 - Protein kinase homolog 4
						GRMZM2G313944	155851730 - 155862962	EDM2-like protein1
						GRMZM2G013936	155881115 - 155904580	ENHANCED DOWNY MILDEW 2
						GRMZM2G102242	155952957 - 155956129	Mnd1 family protein
						GRMZM2G057910	156178938 - 156194571	NAD(P)-binding Rossmann-fold superfamily protein
						GRMZM2G164440	156327934 - 156329194	Bifunctional inhibitor / lipid-transfer protein / seed storage 2S albumin superfamily protein
						GRMZM2G138303	156522035 - 156525133	Tetratricopeptide repeat (TPR)-like superfamily protein
						GRMZM2G052935	156721427 - 156727024	ASK2 - aspartate kinase 2
						GRMZM2G353091	156781449 - 156785134	RING/U-box superfamily protein
						GRMZM2G080139	156857650 - 156866646	Zinc finger (Ran-binding) family protein
						GRMZM2G049588	156939699 - 156960536	Carbon-nitrogen hydrolase family protein
						GRMZM5G863076	157033450 - 157035662	Unknown
						GRMZM2G064163	157209918 - 157214321	Spermidine synthase 1
						GRMZM2G166230	157234438 - 157235974	BBR2 - BBR / BPC-transcription factor 2
						GRMZM2G166245	157236115 - 157238655	Xylulose kinase-1
						GRMZM2G365035	157290493 - 157298357	Calcium-dependent protein kinase 28
						GRMZM5G831712	157461494 - 157494360	PARP2 - Poly (ADP-ribose) polymerase 2
						GRMZM2G107956	157579632 - 157581268	Galactosyl transferase GMA12/MNN10 family protein
						GRMZM2G107968	157604281 - 157608535	Ribosomal RNA small subunit methyltransferase G
						GRMZM2G009626	157630205 - 157639529	UDP-Glycosyltransferase superfamily protein
						GRMZM2G463996	157751399 - 157755893	UDP-Glycosyltransferase superfamily protein
						GRMZM2G464013	157799896 - 157800950	Maternal effect embryo arrest 60
						GRMZM2G102985	157901247 - 157910160	Transmembrane protein
						GRMZM2G019251	158059273 - 158066969	RNA-binding family protein
						GRMZM2G069005	158234737 - 158237941	SNF7 family protein
						GRMZM2G047316	158280766 - 158284014	ALF19 - Alfin-like-transcription factor 19
						GRMZM2G152438	158371044 - 158380013	Reduced lateral root formation
						GRMZM2G455491	158386097 - 158389415	Cadmium / Zinc-transporting ATPase HMA4
						GRMZM2G175576	158406991 - 158410957	Cadmium / Zinc-transporting ATPase HMA3
						GRMZM5G876616	158451491 - 158454015	LURP-one-like protein
						GRMZM2G026301	158609560 - 158614461	Protein kinase superfamily protein
						GRMZM2G139900	158673261 - 158675629	Ribosomal protein L7Ae / L30e / S12e / Gadd45 family protein
						GRMZM2G063643	158834165 - 158839110	RNA-binding KH domain-containing protein
						GRMZM2G162739	158941564 - 158943462	NACTF5 - NAC-transcription factor 5
						GRMZM2G108258	159202747 - 159204523	RAS 5, belonging to the Rab1 GTPase subfamily
						GRMZM2G163769	159987331 - 159989752	Ribosomal protein L22p / L17e family protein
						GRMZM2G127683	160088575 - 160094327	Transmembrane protein
						GRMZM2G304548	160150779 - 160152270	HFI1 - corn-activated Hageman factor inhibitor 1
						GRMZM2G151549	160538409 - 160543692	Eukaryotic translation initiation factor 3E
						GRMZM2G150608	160781682 - 160789474	FHA7 - FHA-transcription factor 7
						GRMZM2G150754	160797324 - 160805591	REF4-related 1
						GRMZM2G171370	160956979 - 160963022	bZIP86 - bZIP-transcription factor 86.
						GRMZM2G051367	161045370 - 161050327	Dolichyl-diphosphooligosaccharide-protein glycosyltransferase 48kDa subunit family protein
						GRMZM2G018241	161123950 - 161130108	CESA9 - Cellulose synthase 9
						GRMZM2G073928	161273580 - 161276954	Leucine-rich repeat protein kinase family protein
						GRMZM2G124103	161347805 - 161350512	Vacuolar ATP synthase subunit G
						GRMZM2G068212	161403209 - 161463883	SFP7 - Sulfate transporter7; sulfate transporter 4.1; ZmSULTR4;1
						GRMZM2G158575	161597342 - 161609272	Tetratricopeptide repeat (TPR)-like superfamily protein
						GRMZM2G088261	161855179 - 161870176	Transducin/WD40 repeat-like superfamily protein
						GRMZM2G060872	162092660 - 162098657	Serine/threonine protein kinase 3
						GRMZM2G411260	162226213 - 162231261	ARM repeat superfamily protein
						GRMZM2G102829	162466718 - 162472431	Poly(A) binding protein 2
						GRMZM2G065276	162962062 - 162982456	RNA binding; abscisic acid binding
						GRMZM2G065227	163002610 - 163003188	Transmembrane protein
						GRMZM2G161382	163317827 - 163319918	CYC11 - Cyclin11
						GRMZM5G874167	163444797 - 163452844	DNA-directed RNA polymerase family protein
						GRMZM2G083972	163561449 - 163565277	Member of a small gene family in Arabidopsis
						GRMZM5G858317	163569389 - 163570111	Unknown
						GRMZM2G163724	163676823 - 163680091	Leucine-rich repeat protein kinase family protein
						GRMZM2G087955	163825728 - 163827600	MYB139 - MYB-transcription factor 139
						GRMZM2G088014	163827874 - 163844533	DNA binding
						GRMZM2G335146	163938643 - 163939749	CAX interacting protein 4
						GRMZM2G042807	164092361 - 164096111	PRP38 family protein
						GRMZM2G056019	164182574 - 164183236	Unknown
						GRMZM2G055883	164187487 - 164191832	DYNAMIN-like 1E
						GRMZM2G017334	164327767 - 164331873	P-loop containing nucleoside triphosphate hydrolases superfamily protein
						GRMZM2G341253	164472793 - 164474499	HXXXD-type acyl-transferase family protein
						AC210204.3_FG002	164667085 - 164668830	Calcium-dependent lipid-binding family protein
						GRMZM2G703231	164722166 - 164724580	ACT-like superfamily protein
						GRMZM2G442555	164859248 - 164860288	Histone superfamily protein
						GRMZM2G142502	164881116 - 164886628	Unknown
						GRMZM2G142544	164888464 - 164893103	U-box domain-containing protein kinase family protein
						GRMZM2G142549	164888844 - 164890196	Unknown
						GRMZM2G085939	164975212 - 164980208	Calmodulin-binding heat-shock protein
						GRMZM2G027166	164987053 - 164989537	Haloacid dehalogenase-like hydrolase (HAD) superfamily protein
						GRMZM2G047727	165103157 - 165107176	Ubiquitin supergroup; Ribosomal protein L40e
						GRMZM2G103345	165262816 - 165266884	Single-stranded nucleic acid binding R3H protein
						GRMZM2G104999	165379883 - 165383807	Uridine-ribohydrolase 1
						GRMZM2G014154	165430753 - 165433979	HP2 - Histidine-containing phosphotransfer protein 2
						GRMZM2G085153	165609242 - 165613195	Nucleic acid binding protein
						GRMZM2G084881	165615333 - 165620418	DAR1 - Monodehydroascorbate reductase homolog 1
						GRMZM2G466578	165830605 - 165833223	Tetratricopeptide repeat (TPR)-like superfamily protein
						GRMZM2G466560	165835409 - 165840972	ENTH/VHS family protein
						GRMZM2G466543	165872056 - 165874345	Arogenate dehydratase 6
						GRMZM2G476810	166075529 - 166078967	Unknown
						GRMZM2G098622	166122620 - 166145565	Embryo defective 3012
						GRMZM2G098545	166180821 - 166183228	Tetratricopeptide repeat (TPR)-like superfamily protein
						GRMZM2G066710	166280431 - 166284968	FUS3-complementing gene 1
						GRMZM2G048928	166337129 - 166343501	Effector molecule of the plant-unique RAB5, ARA6
						GRMZM2G321767	166491856 - 166497280	DHHC-type zinc finger family protein
						GRMZM2G087728	166611613 - 166613123	Senescence-associated gene 12
						GRMZM2G045706	167205349 - 167206978	Senescence-associated gene 12
						GRMZM2G352855	167237699 - 167240039	Alpha / Beta-Hydrolases superfamily protein
						GRMZM5G840225	167327281 - 167333682	Zinc finger C3HC4 type family protein
						GRMZM5G872070	167362256 - 167363675	Unknown
						GRMZM2G064873	167402100 - 167412632	Regulator of chromosome condensation family protein
						GRMZM2G064898	167417589 - 167420386	ORMDL family protein
						GRMZM2G144415	167699659 - 167704400	Unknown
						GRMZM2G363715	167842723 - 167850852	RNA-binding family protein
						GRMZM2G504906	167977405 - 167982718	Protein prenylyltransferase superfamily protein
						GRMZM2G504910	168004228 - 168015880	Protein prenylyltransferase superfamily protein
						GRMZM5G872997	168223508 - 168226664	LUC7 N_terminus domain-containing protein
						GRMZM2G018649	168292354 - 168293777	Plasma membrane intrinsic protein 2
						GRMZM2G548817	168351045 - 168354991	Transmembrane protein
						GRMZM2G092125	168551300 - 168554811	PIP2B - Plasma membrane intrinsic protein 2
						GRMZM2G322661	168699312 - 168707616	DNA directed RNA polymerase 7 kDa subunit
	5	qZEAL-RDW5-1	16.4	202050690 - 204605827	69	GRMZM2G020040	202050924 - 202059781	Heat shock protein 70 (Hsp 70) family protein
		qKC-SDW5-2	6.9			GRMZM2G315127	202060060 - 202065536	Kinetochore protein
						GRMZM2G481604	202083010 - 202085058	Tetratricopeptide repeat (TPR)-like superfamily protein
						GRMZM2G180983	202082974 - 202094134	P-loop containing nucleoside triphosphate hydrolases superfamily protein
						GRMZM2G481605	202095278 - 202096275	HSP20-like chaperones superfamily protein
						GRMZM2G079352	202209988 - 202211260	Unknown
						GRMZM2G475349	202224551 - 202225926	Unknown
						GRMZM2G399207	202229695 - 202230827	Unknown
						GRMZM2G164912	202286047 - 202289158	Glycosyltransferase family protein
						GRMZM2G466298	202294729 - 202303765	Concanavalin A-like lectin protein kinase family protein
						GRMZM2G164948	202313503 - 202315827	NADPH-dependent thioredoxin reductase B
						GRMZM2G028397	202394525 - 202396379	Predicted AT-hook DNA-binding family protein
						GRMZM2G136465	202416165 - 202420768	Hydroxy methylglutaryl CoA reductase 1
						GRMZM2G123796	202517076 - 202521676	RNA-binding family protein
						GRMZM2G123371	202565079 - 202572251	Phosphofructokinase family protein
						GRMZM2G421899	202606374 - 202611806	ARID5 - ARID-transcription factor 5
						GRMZM2G480620	202801975 - 202809174	TRAPPIII complex protein which regulates TGN integrity
						GRMZM2G180930	202811453 - 202814725	Phosphoribosyltransferase family protein
						GRMZM2G180926	202816894 - 202818458	Xylem cysteine peptidase 1. tracheary element vacuolar protein
						GRMZM2G180922	202819046 - 202823622	NAD(P)-binding Rossmann-fold superfamily protein
						GRMZM2G180920	202825219 - 202826665	Hypothetical protein
						AC208539.3_FG002	202930664 - 202931464	Unknown
						GRMZM2G056252	203036110 - 203038070	Fatty acid desaturase 2
						GRMZM2G024211	203173179 - 203174837	A lpha / Beta-Hydrolases superfamily protein
						GRMZM2G038279	203209875 - 203211615	Rho GTPase-activating gacO-like protein
						GRMZM2G038375	203215180 - 203219061	Mitochondrial import inner membrane translocase subunit Tim17 / Tim22 / Tim23 family protein
						GRMZM2G039610	203221761 - 203225973	Tetratricopeptide repeat (TPR)-containing protein
						GRMZM2G096370	203234135 - 203248142	Tetratricopeptide repeat (TPR)-containing protein
						GRMZM2G459104	203262869 - 203263542	Unknown
						GRMZM2G459110	203304149 - 203308763	Hypothetical protein
						GRMZM2G158568	203313494 - 203315969	Ribosomal protein L31e family protein
						GRMZM2G399921	203397973 - 203398690	Transmembrane protein
						GRMZM2G542272	203402576 - 203403244	Unknown
						GRMZM2G399901	203403474 - 203407745	Zinc finger (CCCH-type/C3HC4-type RING finger) family protein
						GRMZM5G837108	203546883 - 203548693	ANT1 - Adenine nucleotide translocator 1
						GRMZM2G085049	203614071 - 203617935	Immunoglobulin E-set superfamily protein
						GRMZM2G382341	203620982 - 203625743	Fimbrin-like protein 2
						GRMZM2G531719	203626113 - 203626730	Unknown
						GRMZM2G382345	203631158 - 203631837	BCL-2-associated athanogene 5
						GRMZM2G045544	203646189 - 203650857	PHD22 - PHD-transcription factor 22
						GRMZM2G045404	203651899 - 203655593	Indole-3-butyric acid response 5
						GRMZM5G848822	203674607 - 203676837	Eukaryotic aspartyl protease family protein
						GRMZM2G129146	203687891 - 203695392	Eukaryotic aspartyl protease family protein
						GRMZM2G128992	203698818 - 203701217	Unknown
						GRMZM2G176270	203796679 - 203804857	DHHC-type zinc finger family protein
						GRMZM2G109039	203817433 - 203823286	Transducin/WD40 repeat-like superfamily protein
						GRMZM2G150172	203926164 - 203934465	LORELEI-LIKE-GPI-ANCHORED PROTEIN 1
						GRMZM2G452580	203935157 - 203940957	Sec14p-like phosphatidylinositol transfer family protein
						GRMZM2G018126	204006064 - 204008467	Endomembrane protein 70 protein family
						GRMZM2G459715	204020061 - 204023408	Pentatricopeptide repeat (PPR) superfamily protein
						GRMZM2G161641	204062211 - 204065565	Amino acid permease 2
						GRMZM2G161728	204066655 - 204071094	Calcium-dependent ARF-type GTPase activating protein family
						GRMZM2G029029	204083826 - 204089115	RNA-binding KH domain-containing protein
						GRMZM2G029186	204089514 - 204100246	Varicose-related
						GRMZM2G075562	204170200 - 204175065	COL5 - C2C2-CO-like-transcription factor 5
						GRMZM2G075372	204177168 - 204181755	Nucleotide / Sugar transporter family protein
						GRMZM5G834354	204187873 - 204192725	S-adenosyl-L-methionine-dependent methyltransferases superfamily protein
						GRMZM2G075158	204195457 - 204198586	Hypothetical protein
						GRMZM2G468299	204207010 - 204208551	D6 protein kinase like 1
						GRMZM2G000280	204209307 - 204287307	Sucrase / Ferredoxin-like family protein
						GRMZM2G012213	204315354 - 204318116	Tetratricopeptide repeat (TPR)-like superfamily protein
						GRMZM2G012044	204318262 - 204322524	Cellulose synthase like E1
						GRMZM2G312944	204328144 - 204330780	RNA methyltransferase domain-containing protein 2
						GRMZM2G145594	204425614 - 204428720	BSDTF6 - BSD-transcription factor 6
						GRMZM2G020285	204493840 - 204497541	O-fucosyltransferase family protein
						GRMZM2G317451	204517830 - 204519100	Encodes a component of the TIC protein translocation machinery mediating the protein translocation across the inner envelope of plastids
						GRMZM2G317450	204518787 - 204522813	bHLH156 - bHLH-transcription factor 156
						GRMZM2G315726	204581564 - 204584243	LAG1 longevity assurance homolog 3
						GRMZM2G019317	204589912 - 204594285	NSP-interacting kinase 1
	5	qZEAL-RDW5-1	16.4	206563089 - 208072333	31	GRMZM2G053396	206572964 - 206575640	Pentatricopeptide (PPR) repeat-containing protein
		qKC-RDW5-1	7.7			GRMZM2G140635	206615281 - 206616679	Protein tyrosine kinase family protein
		qKC-ZnSc5-1	11.7			GRMZM2G140651	206618561 - 206620908	RING / U-box superfamily protein
						GRMZM2G127632	206622614 - 206635150	Protein kinase superfamily protein
						GRMZM2G074267	206727149 - 206730565	PIN2 - PIN-formed protein 2
						GRMZM2G105844	206838596 - 206840547	EXPA2 - Alpha expansin 2
						GRMZM2G405567	206843768 - 206846895	Nucleotide-diphospho-sugar transferases superfamily protein
						GRMZM2G105791	206850855 - 206855627	Starch synthase 2
						GRMZM2G105644	206890298 - 206892838	GGH1 - Geranylgeranyl hydrogenase1
						GRMZM2G105539	206910875 - 206915210	P-loop containing nucleoside triphosphate hydrolases superfamily protein
						GRMZM2G114371	207028707 - 207033498	DCD domain protein
						GRMZM5G836378	207036081 - 207040705	Sphingoid base hydroxylase 2
						GRMZM2G380177	207056026 - 207062515	Transmembrane protein
						GRMZM2G380184	207060907 - 207063925	Cullin 3
						GRMZM2G380197	207142444 - 207147783	2-oxoacid dehydrogenases acyltransferase family protein
						GRMZM5G824698	207349898 - 207352596	S-adenosyl-L-methionine-dependent methyltransferases superfamily protein
						GRMZM2G130548	207377426 - 207383775	HVA22 homologue A
						GRMZM2G130459	207387145 - 207391400	EREB187 - AP2-EREBP-transcription factor 187
						GRMZM2G036092	207505190 - 207506597	bHLH30 - bHLH-transcription factor 30
						GRMZM2G036418	207513871 - 207520104	RINT-1 / TIP-1 family
						GRMZM2G118366	207655630 - 207657582	Glutaredoxin family protein
						GRMZM2G070218	207705016 - 207707881	Shikimate kinase 1
						GRMZM2G070045	207708230 - 207730486	SEC6. Encodes a member of the exocyst complex gene family
						GRMZM2G116981	207730826 - 207733163	SEC6. Encodes a member of the exocyst complex gene family
						GRMZM2G017355	207897007 - 207898535	mTERF18 - mTERF domain protein 7b
						GRMZM2G017429	207899002 - 207900503	mTERF19 - mTERF-domain protein 19
						GRMZM5G862663	207987194 - 207989124	ATPC1 - ATP synthase chloroplast subunit 1
						GRMZM2G012399	207993925 - 207996093	S-adenosyl-L-methionine-dependent methyltransferases superfamily protein
						GRMZM5G881253	208025945 - 208029939	Unknown
						GRMZM2G335978	208060721 - 208065128	Eukaryotic aspartyl protease family protein
						GRMZM2G036286	208070590 - 208072068	Senescence-associated family protein
	5	qZEAL-RDW5-1	16.4	214114373 - 215340163	45	GRMZM2G180422	214110744 - 214116787	Plasma membrane fusion protein
		qKB-R/S5-1	6.4			GRMZM2G180418	214122497 - 214132628	PTAC17 - Plastid transcriptionally active17
						GRMZM2G180419	214124567 - 214125996	Serine-rich protein-related
						GRMZM2G180384	214143136 - 214146617	Proteasome maturation factor UMP1
						GRMZM2G083812	214166462 - 214170119	Glucuronidase 3
						GRMZM2G083745	214170899 - 214174196	S-adenosyl-L-methionine-dependent methyltransferases superfamily protein
						GRMZM2G178892	214279708 - 214285272	Monogalactosyldiacylglycerol synthase 2
						GRMZM2G178887	214286082 - 214287806	Unknown
						GRMZM2G027282	214333660 - 214337810	Regulatory particle triple-A ATPase 5A
						GRMZM2G027019	214332147 - 214334181	Vesicle-associated membrane protein 713
						GRMZM2G096815	214374326 - 214377995	S-adenosyl-L-methionine-dependent methyltransferases superfamily protein
						GRMZM2G096962	214377336 - 214380504	Ribosomal protein L9
						GRMZM2G536644	214380793 - 214391170	Molecular chaperone Hsp40 / DnaJ family protein
						GRMZM2G092632	214392778 - 214405190	CLP protease proteolytic subunit 6
						GRMZM2G030465	214411995 - 214413229	IAA9 - Aux / IAA-transcription factor 9
						GRMZM2G030523	214424827 - 214427180	PCNA1 - Proliferating cell nuclear antigen 1
						GRMZM2G030744	214428616 - 214432103	bHLH168 - bHLH-transcription factor 168
						GRMZM2G008728	214501921 - 214505061	Oxidoreductase zinc-binding dehydrogenase family protein
						GRMZM2G008715	214505290 - 214507253	Acyl-CoA-binding domain protein
						GRMZM5G855200	214507519 - 214512231	Protein kinase superfamily protein
						GRMZM2G465769	214514282 - 214515044	Unknown
						GRMZM2G163200	214526228 - 214532172	GATA24 - C2C2-GATA-transcription factor 24
						GRMZM5G846198	214612788 - 214621634	UGGT1 - UDP-glucose:glycoprotein glucosyltransferase 1
						GRMZM2G370162	214627573 - 214650917	UGGT1 - UDP-glucose:glycoprotein glucosyltransferase 1
						GRMZM2G178038	214707039 - 214711687	Zinc finger (C3HC4-type RING finger) family protein
						GRMZM2G178074	214716155 - 214717575	PPCK1 - Phosphoenolpyruvate carboxylase kinase 1
						GRMZM2G080247	214761087 - 214764151	Rho termination factor
						GRMZM2G168335	214842953 - 214846166	Wall associated kinase 3
						GRMZM5G857701	214949731 - 214951374	NACTF104 - NAC-transcription factor 104
						GRMZM2G150876	215006181 - 215011162	Ypt / Rab-GAP domain of gyp1p superfamily protein
						GRMZM2G150912	215011519 - 215016709	Endoribonucleases
						GRMZM2G150932	215017420 - 215021669	Casein kinase I-like 8
						GRMZM2G150984	215023744 - 215028711	P-loop containing nucleoside triphosphate hydrolases superfamily protein
						GRMZM2G058289	215052090 - 215055981	Ankyrin repeat family protein
						GRMZM5G857379	215058923 - 215062058	Transducin / WD40 repeat-like superfamily protein
						GRMZM5G872499	215062048 - 215063124	PHOS3 - Phosphate transporter 3
						GRMZM5G851655	215064220 - 215065771	PHOS3 - Phosphate transporter 3
						GRMZM2G144146	215232823 - 215235104	Octicosapeptide / Phox / Bem1p family protein
						GRMZM5G806257	215252927 - 215260621	Trimeric LpxA-like enzyme
						GRMZM5G808853	215261694 - 215263271	Phloem protein 2-B12
						GRMZM5G862817	215265820 - 215267696	Phloem protein 2-B1
						GRMZM5G806449	215289055 - 215297830	Glutathione-disulfide reductase
						GRMZM5G894016	215300432 - 215302809	3-ketoacyl-CoA synthase 12
						GRMZM5G897740	215320399 - 215321009	Defensin-like (DEFL) family protein
						GRMZM2G079013	215339270 - 215352683	LUG2 - leunig-related 2
	10	qZEAL-R/S10-1	17.4	65096597 - 86418193	139	GRMZM2G145870	69423694 - 69433754	IGPS3 - indole-3-glycerolphosphate synthase3
		qZEAL-ZnSc10-1	54.8			GRMZM2G091316	69777703 - 69782341	Transferases;folic acid binding
						GRMZM2G091373	69794067 - 69796702	Transferases;folic acid binding
						GRMZM2G431030	69866845 - 69871569	Elongation factor
						GRMZM2G138997	70055716 - 70060039	RING / U-box superfamily protein
						GRMZM2G103287	70222469 - 70228198	Galactose mutarotase-like superfamily protein
						GRMZM2G103250	70277239 - 70279051	Tetratricopeptide repeat (TPR)-like superfamily protein.
						GRMZM2G170958	70340039 - 70341573	HB73 - Homeobox-transcription factor 73
						GRMZM2G102231	70574203 - 70578498	Glycerol-3-phosphatase 1
						GRMZM2G448627	70632831 - 70633760	Late Embryogenesis Abundant 4-5
						GRMZM2G128907	70814526 - 70815137	Unknown
						GRMZM2G049641	70919582 - 70921917	TPLATE complex subunit involved in clathirin mediated endocytosis
						GRMZM2G112782	71050669 - 71054403	Syntaxin / t-SNARE family protein
						GRMZM2G045507	71159382 - 71163404	SET domain-containing protein
						GRMZM2G008209	71175493 - 71179030	4-Phospho-panto-thenoylcysteine synthetase
						GRMZM2G023275	71277026 - 71283390	Octicosapeptide / Phox / Bem1p (PB1) domain-containing protein / tetratricopeptide repeat (TPR)-containing protein
						GRMZM2G106590	71359370 - 71362809	Regulator of Vps4 activity in the MVB pathway protein
						GRMZM2G087395	71462222 - 71464270	RNA-binding CRS1 / YhbY (CRM) domain-containing protein
						GRMZM2G384439	71465528 - 71471588	Somatic embryogenesis receptor-like kinase 1
						GRMZM2G123654	71605526 - 71607381	HXXXD-type acyl-transferase family protein
						GRMZM2G055059	71671571 - 71672608	Unknown
						GRMZM2G072621	71863859 - 71864113	Unknown
						GRMZM2G122941	72293834 - 72295133	Unknown
						GRMZM2G442458	72545780 - 72549399	Appr-1-p processing enzyme family protein
						GRMZM2G141136	72608367 - 72610773	Unknown
						GRMZM2G039824	72803506 - 72805402	Transcription elongation factor B polypeptide
						GRMZM2G039671	72806489 - 72815643	Unknown
						GRMZM2G343080	72816258 - 72819561	Haloacid dehalogenase-like hydrolase (HAD) superfamily protein.
						GRMZM2G027750	72979380 - 72986276	Cullin 3
						GRMZM2G022359	73127981 - 73131426	EREB163 - AP2-EREBP-transcription factor 163
						GRMZM2G022506	73131964 - 73135240	Transmembrane protein
						GRMZM2G133512	73205123 - 73217433	Nuclear RNA polymerase D2A
						GRMZM2G380776	74206140 - 74206667	Unknown
						GRMZM2G150680	74606915 - 74610666	MYB155 - MYB-transcription factor 155
						GRMZM2G438602	74807436 - 74810083	Valyl-tRNA synthetase / valine--tRNA ligase
						GRMZM2G106974	74848346 - 74854487	Valyl-tRNA synthetase / valine--tRNA ligase
						GRMZM2G165757	74900983 - 74905898	ATP-binding cassette 14
						GRMZM2G113682	75145548 - 75147356	Expression of this gene is induced by abscisic acid and salt stress
						GRMZM2G369260	75667454 - 75668447	Polymerase delta 4
						GRMZM2G055125	75668946 - 75675094	Mob1 / phocein family protein
						GRMZM2G099352	75695843 - 75698244	RPS3 - Ribosomal protein S3
						GRMZM2G068808	75809516 - 75814889	CPPS3 - Copalyl diphosphate synthase 3
						GRMZM2G078292	76224116 - 76227981	Amino acid permease family protein
						GRMZM2G079908	76402669 - 76405224	ACB1 - Acyl-CoA-binding protein 1
						GRMZM2G079759	76406071 - 76409499	Rubredoxin family protein
						GRMZM2G145123	76504596 - 76506978	RING / U-box superfamily protein
						GRMZM5G868191	76507712 - 76507858	Unknown
						GRMZM2G145130	76508485 - 76510356	Tetratricopeptide repeat (TPR)-like superfamily protein
						GRMZM2G042895	76586652 - 76588863	bHLH116 - bHLH-transcription factor 116
						GRMZM2G042992	76636684 - 76645749	REL2 - Ramosa1 enhancer locus 2
						GRMZM2G177621	76946771 - 76953599	Endomembrane protein 70 protein family
						GRMZM2G171187	77103630 - 77105995	Unknown
						GRMZM2G171236	77111604 - 77115007	NADH-ubiquinone oxidoreductase-related
						GRMZM2G178014	77180426 - 77187019	Alpha / Beta-Hydrolases superfamily protein
						GRMZM2G110145	77269241 - 77276091	Cellulose-synthase like D2
						GRMZM2G030659	77440717 - 77445353	Unknown
						GRMZM2G305582	77445844 - 77449872	C3H31 - C3H-transcription factor 331
						GRMZM2G001530	77673604 - 77678581	Duplicated homeodomain-like superfamily protein.
						GRMZM2G001551	77679784 - 77686842	P-loop containing nucleoside triphosphate hydrolases superfamily protein
						GRMZM2G023073	77744750 - 77760332	STM1 - Stomatin 1
						GRMZM2G003715	78128657 - 78132883	NACTF61 - NAC-transcription factor 61
						GRMZM2G309933	78137687 - 78143187	Unknown
						GRMZM2G474769	78320150 - 78323416	Homeodomain-like superfamily protein
						GRMZM2G175165	78392259 - 78392914	Unknown
						GRMZM2G175101	78397175 - 78397662	Unknown
						GRMZM2G123886	79135496 - 79138192	MAP kinase 4
						GRMZM5G806309	79139642 - 79143252	Hydroxyproline-rich glycoprotein family protein
						GRMZM2G032564	79271116 - 79273839	Ribosomal protein L34e superfamily protein
						AC203985.4_FG001	79278672 - 79281753	Phosphate starvation-induced gene 3
						AC203985.4_FG005	79370667 - 79371107	Prefoldin 2
						GRMZM2G085845	79408788 - 79410779	Cytochrome P450 superfamily protein
						GRMZM2G086117	79412450 - 79415831	Glyceraldehyde-3-phosphate dehydrogenase C subunit 1
						GRMZM2G044306	79744869 - 79753713	RNA polymerase II large subunit
						GRMZM2G086496	80042433 - 80048640	NPF1 - Nitrate transporter / Peptide transporter family 1
						GRMZM2G385989	80051165 - 80055128	Plant VAMP (vesicle-associated membrane protein) family protein
						GRMZM2G063322	80144055 - 80155070	Small nuclear ribonucleoprotein family protein
						GRMZM2G172642	80314625 - 80319134	Cupredoxin superfamily protein
						GRMZM2G077486	80405919 - 80409657	OMT3 - Caffeoyl CoA O-methyltransferase3
						GRMZM2G096367	80487847 - 80492626	XH / XS domain-containing protein
						GRMZM2G446895	80586974 - 80615656	ARM repeat superfamily protein
						GRMZM2G154328	80671607 - 80676342	TMPIT-like protein
						GRMZM2G372475	80716422 - 80719823	ENHANCED DISEASE RESISTANCE-like protein
						GRMZM2G070555	80735518 - 80738295	MEF2BNB-like protein
						GRMZM2G372553	80739035 - 80739695	ANE3 - Androgenic embryo 3
						GRMZM2G008271	80848101 - 80849365	BAP1a - basal layer antifungal protein 1a
						GRMZM2G008403	80864563 - 80865256	bap1b - basal layer antifungal protein1b
						GRMZM2G058703	80874447 - 80875294	Unknown
						GRMZM2G054359	80906029 - 80906600	Unknown
						GRMZM2G054397	80915974 - 80922583	Unknown
						GRMZM2G034862	81019610 - 81020332	Unknown
						GRMZM2G133370	81041921 - 81042623	BAP3b - Basal layer antifungal protein 3b
						GRMZM2G133382	81051899 - 81052618	Unknown
						GRMZM2G123411	81169650 - 81173126	Unknown
						GRMZM2G134756	81440967 - 81446269	Tyrosyl-tRNA synthetase
						GRMZM2G021864	81535547 - 81558116	Compromised recognition of TCV 1
						GRMZM2G108892	81687756 - 81715797	MYBR84 - MYB-related-transcription factor 84
						GRMZM2G325907	81827003 - 81830285	MYB92 - MYB-transcription factor 92
						GRMZM2G070780	81957135 - 81959818	Erythronate-4-phosphate dehydrogenase family protein
						GRMZM5G832300	82024590 - 82028535	RING / U-box superfamily protein
						GRMZM5G828229	82038497 - 82043288	Monodehydroascorbate reductase 6
						GRMZM5G856084	82046176 - 82050508	DNAJ heat shock family protein
						GRMZM2G032684	82156623 - 82166653	Oxidoreductase family protein
						GRMZM2G149786	82204971 - 82209384	LSD1-like 2
						GRMZM2G415470	82234893 - 82235847	Unknown
						GRMZM2G121137	82668664 - 82669799	Unknown
						GRMZM2G063363	82715338 - 82721486	PapD-like superfamily protein
						GRMZM2G304010	83311612 - 83313392	Plant U-box 8
						GRMZM2G003765	83417551 - 83420067	Plastid developmental protein DAG
						GRMZM2G003897	83447249 - 83454536	RNA-binding family protein
						GRMZM2G393742	83537975 - 83543629	CHR156 - chromatin complex subunit A 156
						GRMZM2G093858	83547930 - 83551738	Calcium / Calmodulin-regulated receptor-like kinase 1
						GRMZM2G093744	83592659 - 83595951	bHLH162 - bHLH-transcription factor 162
						GRMZM2G060054	83668052 - 83683626	Vacuolar H+-pumping ATPase 16 kDa proteolipid subunit 4
						GRMZM2G572013	83685716 - 83686304	Unknown
						GRMZM2G103785	83739818 - 83743130	Glycosyltransferase
						GRMZM2G148884	83834412 - 83835512	Uclacyanin 1
						GRMZM2G148924	84093213 - 84097287	FIE2 - Fertilization independent endosperm 2
						GRMZM2G310453	84158573 - 84160338	Unknown
						GRMZM2G004957	84229053 - 84232594	HB18 - Homeobox-transcription factor 18
						GRMZM2G005024	84233753 - 84236564	Tryptophan synthase beta-subunit 1
						GRMZM2G005126	84238750 - 84246224	C3H24 - C3H-transcription factor 324
						GRMZM2G170291	84256013 - 84265152	DNAse I-like superfamily protein
						GRMZM2G022793	84487395 - 84491371	Nodulin MtN21 / EamA-like transporter family protein
						GRMZM5G845163	84595566 - 84600453	S-adenosyl-L-methionine-dependent methyltransferases superfamily protein
						GRMZM2G139157	84601011 - 84607592	Protein kinase superfamily protein
						GRMZM2G439268	84608056 - 84608542	Lipid transfer protein
						GRMZM5G830329	84608950 - 84610855	MS10 - Male sterile 10
						GRMZM2G136341	84755864 - 84760724	EYES ABSENT homolog
						GRMZM2G125977	85009586 - 85012377	Beta-carotene isomerase D27
						GRMZM2G101926	85183558 - 85186889	Transmembrane protein
						GRMZM2G101875	85188397 - 85193819	CER8 - Eceriferum8
						GRMZM2G124744	85311893 - 85313117	Unknown
						GRMZM2G155836	85497258 - 85500099	Shaggy-related kinase 11
						GRMZM2G060798	85581746 - 85584681	Protein phosphatase 2C family protein
						GRMZM2G394500	85640717 - 85645627	Peroxidase superfamily protein
						GRMZM2G082522	85841375 - 85844367	PTI1-like tyrosine-protein kinase 3
						AC205413.4_FG001	86099715 - 86100737	Peroxidase superfamily protein
						GRMZM2G177792	86284199 - 86285519	PRX35 - Peroxidase35
						GRMZM2G061135	86414459 - 86418193	S-adenosylmethionine synthetase family protein
